# Supplementary material
Source: publisher figshare collection journal article supplement (https://sage.figshare.com/ndownloader/files/18811274)
Supplement: Supplementary file 1 [file 18811274]

Supplementary Table 2.

*Quality Appraisal of the Cross-Sectional Studies Included in this Review (n = 19)*

| Studies                    | Appraisal Questions                                                |                                                                  |                                                            |                                                                              |                                          |                                                              |                                                             |                                                |
|----------------------------|--------------------------------------------------------------------|------------------------------------------------------------------|------------------------------------------------------------|------------------------------------------------------------------------------|------------------------------------------|--------------------------------------------------------------|-------------------------------------------------------------|------------------------------------------------|
|                            | Q1: Were the criteria for inclusion in the sample clearly defined? | Q2: Were the study subjects and the setting described in detail? | Q3: Was the exposure measured in a valid and reliable way? | Q4: Were objective, standard criteria used for measurement of the condition? | Q5: Were confounding factors identified? | Q6: Were strategies to deal with confounding factors stated? | Q7: Were the outcomes measured in a valid and reliable way? | Q8: Was appropriate statistical analysis used? |
| Willard-Grace et al., 2013 | •                                                                  | •                                                                | •                                                          | •                                                                            | •                                        | •                                                            | •                                                           | •                                              |
| Rabatin et al., 2016       | •                                                                  | ◦                                                                | •                                                          | •                                                                            | •                                        | •                                                            | •                                                           | •                                              |
| Simonetti et al., 2017     | •                                                                  | •                                                                | •                                                          | •                                                                            | •                                        | •                                                            | •                                                           | •                                              |
| Edwards et al., 2017       | •                                                                  | •                                                                | •                                                          | •                                                                            | •                                        | •                                                            | •                                                           | •                                              |
| Blechter et al., 2017      | •                                                                  | •                                                                | •                                                          | •                                                                            | ?                                        | •                                                            | •                                                           | •                                              |
| Spinelli et al., 2016      | •                                                                  | •                                                                | •                                                          | •                                                                            | •                                        | •                                                            | •                                                           | •                                              |
| Helfrich et al., 2014      | •                                                                  | •                                                                | •                                                          | •                                                                            | •                                        | •                                                            | •                                                           | •                                              |
| Olayiwola et al., 2018     | •                                                                  | •                                                                | •                                                          | •                                                                            | •                                        | •                                                            | •                                                           | •                                              |
| Linzer et al., 2009        | •                                                                  | •                                                                | •                                                          | •                                                                            | •                                        | •                                                            | •                                                           | •                                              |

|                        |   |   |   |   |   |   |   |   |   |
|------------------------|---|---|---|---|---|---|---|---|---|
| Robertson et al., 2017 | • | • | • | • | • | • | • | ? | • |
| Babbott et al., 2014   | • | • | • | • | • | • | • | • | • |
| Edwards et al., 2018   | • | • | • | • | • | • | • | • | • |
| Yoon et al., 2017      | • | • | • | • | • | • | • | • | • |
| Williams et al., 2007  | • | • | • | • | • | • | • | • | • |
| Kim et al., 2018       | • | • | • | • | • | • | • | • | • |
| Zubatsky et al., 2018  | • | • | • | • | • | • | • | • | • |
| Sun et al., 2017       | • | • | • | • | • | • | • | • | • |
| Whitebird et al., 2017 | • | • | • | • | • | ° | • | • | • |
| Helfrich et al., 2017  | • | • | • | • | • | • | • | • | • |

---

Note. • = Yes; ° = No; ? = Unclear; N/A = Not Applicable; Q = Question;
